# Supplementary material
Source: PubMed Central journal article supplement (PMC2811523)

## Supplementary Figure 1

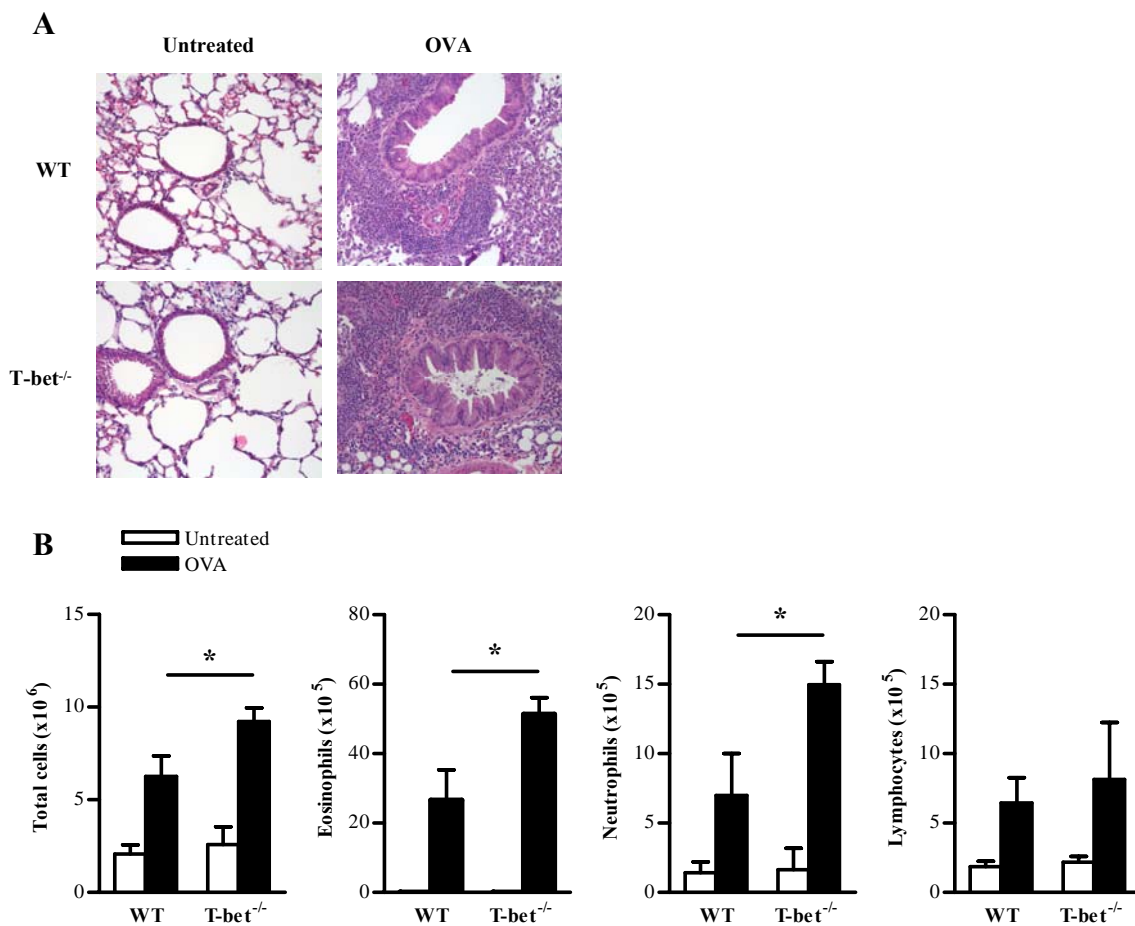

Supplementary Figure 2

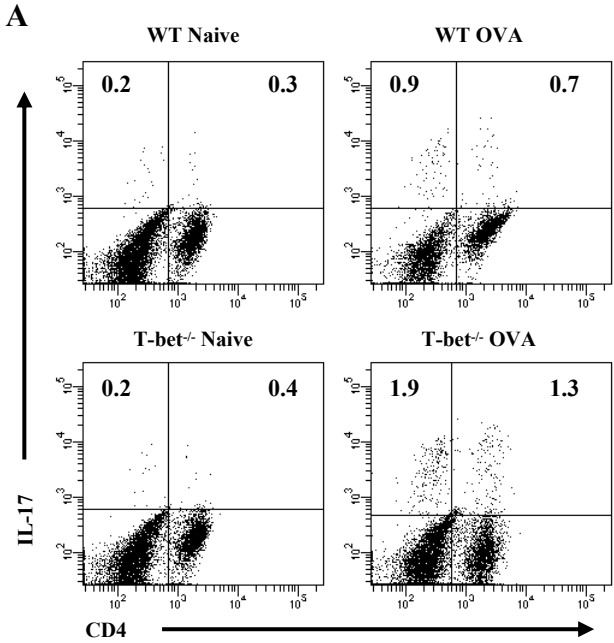

Supplement: NIHMS152038-supplement-01.pdf [file NIHMS152038-supplement-01.pdf]
